# Supplementary material for: Randomized clinical trial comparing endovenous laser ablation, radiofrequency ablation, foam sclerotherapy and surgical stripping for great saphenous varicose veins
Source: Oxford University Press journal article supplement (doi:10.1002/bjs.7555), 2011-07-04
Supplement: bjs_7555_sm_supportinginformations.doc [file bjs_7555_sm_supportinginformations.doc]

BJS7555

Randomized clinical trial comparing endovenous laser ablation, radiofrequency ablation, foam sclerotherapy and surgical stripping for great saphenous varicose veins

L. H. Rasmussen, M. Lawaetz, L. Bjoern, B. Vennits, A. Blemings and B. Eklof

|  | Pretreatment | 3 days | 1 month | 1 year | *P* to 1 year* |
| --- | --- | --- | --- | --- | --- |
| Physical functioning |  |  |  |  |  |
| EVLA | 83.16(16.85) | 66.89(26.17) | 87.63(15.5) | 92.02(11.61) | < 0.001 |
| RFA | 84.05(18.50) | 75.07(22.32) | 87.80(17.63) | 92.22(12.62) | < 0.001 |
| UGFS | 83.49(17.72) | 74.19(25.50) | 88.03(15.14) | 91.33(14.93) | < 0.001 |
| Stripping | 83.31(18.89) | 57.67(30.39) | 86.80(15.07) | 92.82(13.35) | < 0.001 |
| Role – physical |  |  |  |  |  |
| EVLA | 83.80(22.31) | 70.06(28.34) | 81.54(20.17) | 93.51(14.78) | < 0.001 |
| RFA | 87.15(21.44) | 77.34(27.08) | 84.33(20.49) | 94.65(10.64) | < 0.001 |
| UGFS | 86.49(21.48) | 75.75(30.11) | 83.97(22.28) | 90.36(20.56) | 0.015 |
| Stripping | 85.35(20.38) | 65.36(29.81) | 79.59(22.55) | 93.41(16.32) | < 0.001 |
| Bodily pain |  |  |  |  |  |
| EVLA | 70.94(20.96) | 59.39(23.73) | 65.62(23.61) | 88.43(19.55) | < 0.001 |
| RFA | 72.71(22.37) | 68.63(20.44) | 76.69(22.12) | 89.92(16.85) | < 0.001 |
| UGFS | 71.40(20.37) | 66.93(24.14) | 74.88(21.32) | 85.11(23.45) | < 0.001 |
| Stripping | 71.30(22.05) | 57.69(25.08) | 66.47(24.18) | 88.77(17.11) | < 0.001 |
| General health |  |  |  |  |  |
| EVLA | 60.55(13.76) | 61.12(13.32) | 63.27(13.89) | 64.90(11.99) | 0.001 |
| RFA | 62.38(13.30) | 63.41(14.25) | 65.28(12.91) | 67.08(11.82) | < 0.001 |
| UGFS | 62.58(15.00) | 64.30(14.66) | 65.52(15.07) | 63.36(18.31) | 0.117 |
| Stripping | 63.57(15.01) | 63.82(13.66) | 66.11(13.17) | 66.02(14.00) | 0.003 |
| Vitality |  |  |  |  |  |
| EVLA | 64.68(18.60) | 66.43(20.50) | 71.60(16.73) | 77.74(14.03) | < 0.001 |
| RFA | 66.99(19.30) | 71.83(18.76) | 74.01(15.35) | 76.00(17.51) | < 0.001 |
| UGFS | 68.07(20.47) | 71.69(20.76) | 72.78(20.05) | 73.20(22.67) | 0.002 |
| Stripping | 66.90(21.53) | 65.43(21.04) | 70.80(17.49) | 76.99(15.54) | < 0.001 |
| Social functioning |  |  |  |  |  |
| EVLA | 92.93(15.74) | 88.92(22.01) | 91.32(18.95) | 96.51(11.22) | 0.001 |
| RFA | 93.15(14.38) | 91.94(15.88) | 93.75(14.76) | 97.11(84.45) | < 0.001 |
| UGFS | 92.07(18.41) | 91.67(19.21) | 93.44(15.68) | 93.10(16.51) | 0.533 |
| Stripping | 90.36(17.56) | 85.28(20.06) | 90.96(15.31) | 95.19(11.60) | 0.004 |
| Role – emotional |  |  |  |  |  |
| EVLA | 88.67(20.40) | 84.95(25.03) | 90.58(17.79) | 95.95(10.15) | < 0.001 |
| RFA | 91.67(16.02) | 85.77(23.00) | 90.84(16.85) | 94.50(11.02) | 0.008 |
| UGFS | 92.41(16.73) | 88.84(19.95) | 91.20(16.91) | 91.92(17.11) | 0.874 |
| Stripping | 88.17(18.68) | 80.21(25.57) | 89.16(17.78) | 94.20(14.02) | 0.003 |
| Mental health |  |  |  |  |  |
| EVLA | 80.34(15.05) | 80.44(15.45) | 84.67(13.98) | 87.70(10.51) | < 0.001 |
| RFA | 80.18(14.70) | 84.05(13.18) | 84.79(13.74) | 87.08(11.94) | < 0.001 |
| UGFS | 83.00(16.05) | 85.25(15.25) | 86.80(12.84) | 84.58(15.77) | 0.033 |
| Stripping | 79.27(16.04) | 78.43(17.46) | 82.88(14.71) | 85.92(12.18) | < 0.001 |

Values are mean(s.d.). EVLA, endovenous laser ablation; RFA, radiofrequency ablation; UGFS, ultrasound-guided foam sclerotherapy. *ANCOVA.
